# Supplementary material for: Photocatalytic water splitting for hydrogen production with high efficiency monolayer In2Te5: a theoretical study
Source: Royal Society of Chemistry journal article supplement (doi:10.1039/d3cp02615a), 2023-01-01
Supplement: d3cp02615a1.pdf [file d3cp02615a1.pdf]

## Photocatalytic Water Splitting for Hydrogen Production with High Efficiency of Monolayer In<sub>2</sub>Te<sub>5</sub>: A Theoretical Study

Cong Zhang,<sup>a</sup> Meiping Tan, Xin Lu, Wenzhuo Li,<sup>a</sup> Yang Yu,<sup>a</sup> Qiang Wang,<sup>b</sup> WenjuZhang,<sup>a</sup> Xiaole Qiu,<sup>a</sup> Hongchao Yang<sup>\*a</sup>

<sup>a</sup>Department of Physics and Electronic Information, Weifang University, Weifang 261061, China

<sup>b</sup>Key laboratory for Microstructural Material Physics of Hebei Province, School of Science, Yanshan University, Qinhuangdao, 066104, China

\*Corresponding author: [hc\\_yang90@163.com](mailto:hc_yang90@163.com)

**Table S1** Bader charge transfer from In to each Te atom (unit: *e*).

|     | Te1   | Te2   | Te3   | Te4   | Te5   | Te6   | Te7   | Te8   | Te9 | Te10 |
|-----|-------|-------|-------|-------|-------|-------|-------|-------|-----|------|
| In1 | 0.274 |       |       | 0.274 |       | 0.274 |       |       |     |      |
| In2 |       | 0.274 | 0.274 |       |       |       |       | 0.274 |     |      |
| In3 |       | 0.274 |       |       | 0.274 |       |       | 0.274 |     |      |
| In4 |       |       |       | 0.274 |       | 0.274 | 0.274 |       |     |      |

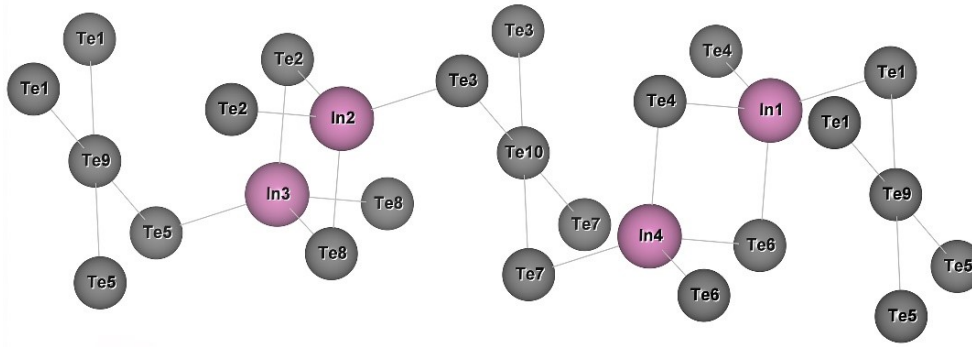

**Fig. S1** The ML  $\text{In}_2\text{Te}_5$  corresponding to Table S1.

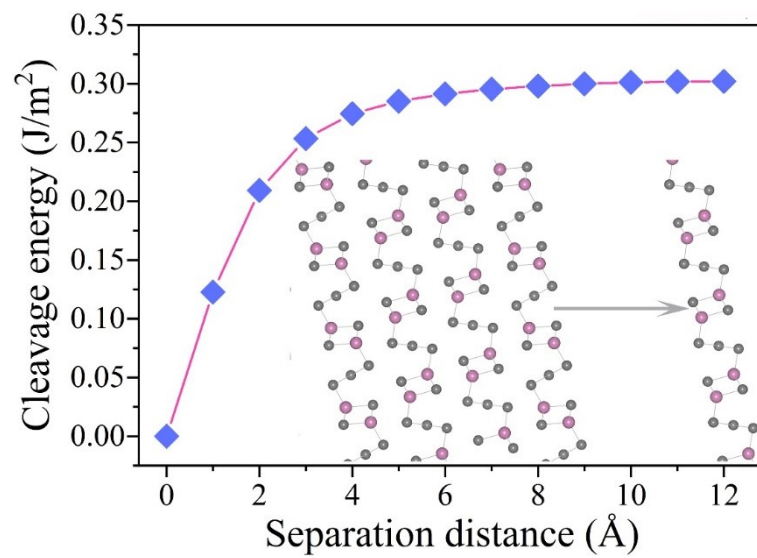

**Fig. S2** The calculated cleavage energy varies with separation distance of the ML  $\text{In}_2\text{Te}_5$ .

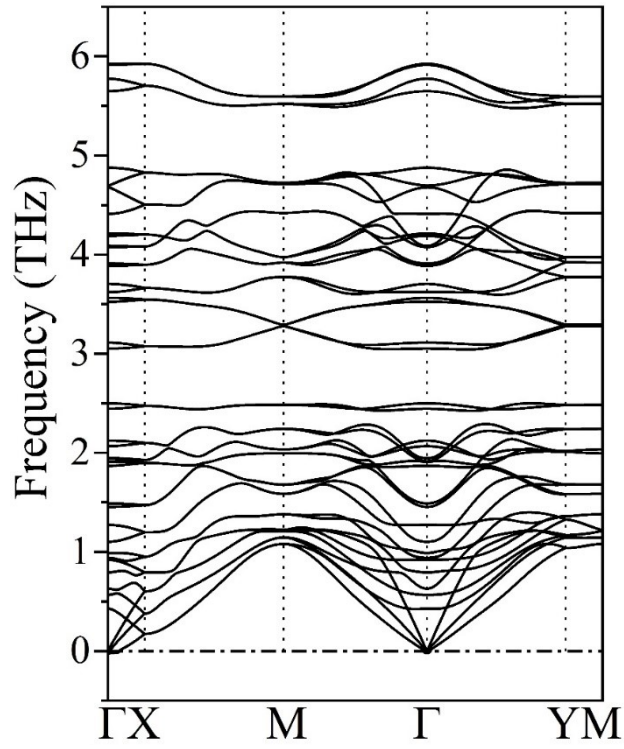

**Fig. S3** The calculated phonon spectrum of the ML  $\text{In}_2\text{Te}_5$ .

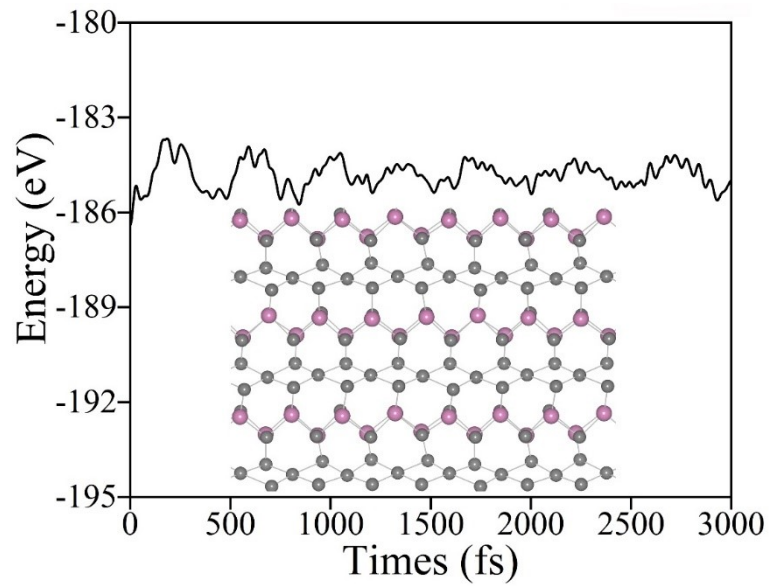

**Fig. S4** The time-dependent evolution of total energy for the ML  $\text{In}_2\text{Te}_5$ .

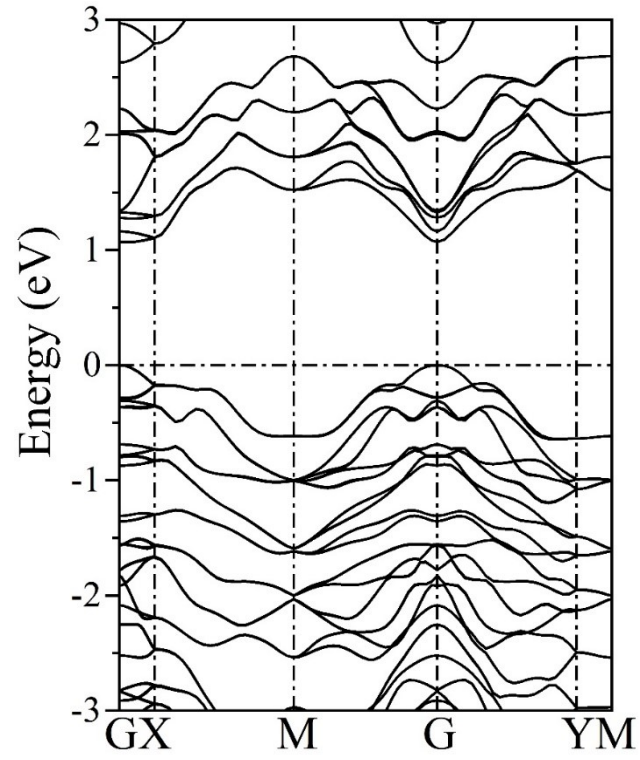

**Fig. S5** The calculated band structure with SOC effect based on PBE functional of the ML In<sub>2</sub>Te<sub>5</sub>.
